## Correction: Simultaneous delivery of olaparib and carboplatin in PEGylated liposomes imparts this drug combination hypersensitivity and selectivity for breast tumor cells

Vojtech Novohradsky<sup>1</sup>, Juraj Zajac<sup>1</sup>, Oldrich Vrana<sup>1</sup>, Jana Kasparkova<sup>1</sup> and Viktor Brabec<sup>1</sup>

<sup>1</sup> Institute of Biophysics, Czech Academy of Sciences, Kralovopolska 135, CZ-61265 Brno, Czech Republic

**Published:** October 30, 2018

**Copyright:** Novohradsky et al. This is an open-access article distributed under the terms of the Creative Commons Attribution License 3.0 (CC BY 3.0), which permits unrestricted use, distribution, and reproduction in any medium, provided the original author and source are credited.

**This article has been corrected:** The correct Grant information is given below:

### ACKNOWLEDGMENTS

This work was supported by the Czech Science Foundation, Grant No. 18-09502S. The authors thank to Dr. Klára Čépe, Dr. Václav Ranc and Zuzana Chaloupková from the Regional Centre of Advanced Technologies and Materials (Olomouc, Czech Republic) for the TEM, DLS and  $\xi$ -potential analysis.

Original article: Oncotarget. 2018; 9:28456-28473. <https://doi.org/10.18632/oncotarget.25466>
